# Supplementary material for: Fabrication of Ultranarrow Nanochannels with Ultrasmall Nanocomponents in Glass Substrates
Source: MDPI journal article supplement (doi:10.3390/mi12070775), 2021-06-30
Supplement: s1 [file s1]

Article

# Fabrication of ultranarrow nanochannels with ultrasmall nano-components in glass substrates

Hiroki Kamai <sup>1</sup> and Yan Xu<sup>\*,1,2,3</sup>

<sup>1</sup> Department of Chemical Engineering, Graduate School of Engineering, Osaka Prefecture University, Sakai, Osaka 599-8570, Japan. Email: xu@chemeng.osakafu-u.ac.jp

<sup>2</sup> Japan Science and Technology Agency (JST), PRESTO, Kawaguchi, Saitama 332-0012, Japan

<sup>3</sup> NanoSquare Research Institute, Research Center for the 21st Century, Organization for Research Promotion, Osaka Prefecture University, Sakai, Osaka 599-8570, Japan

\* Correspondence: xu@chemeng.osakafu-u.ac.jp; Tel.:

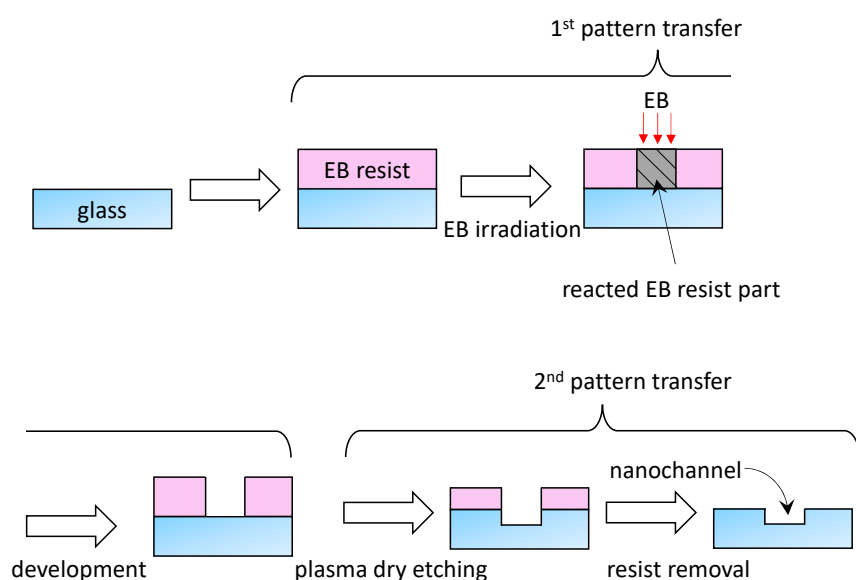

**Figure S1.** Schematic of process for fabricating the nanochannel in the glass substrate.

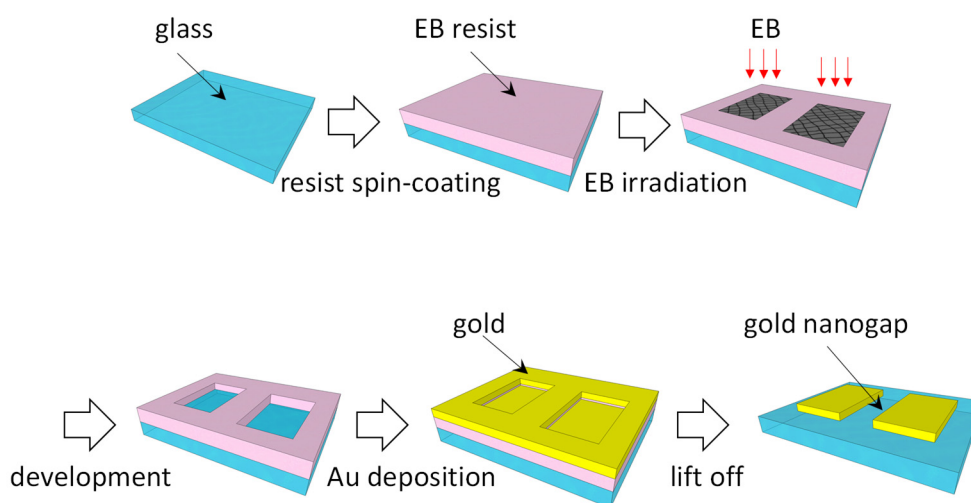

**Figure S2.** Schematic of process for fabricating gold nanogaps on the glass substrate.

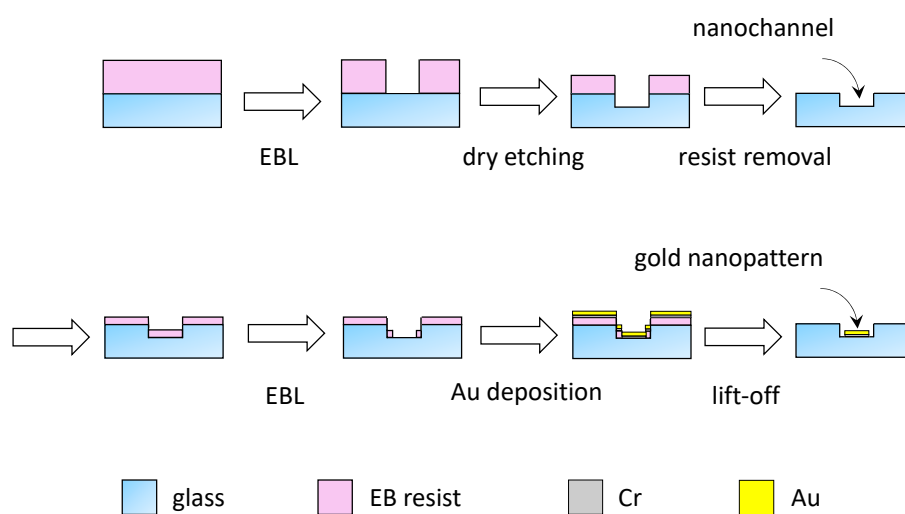

**Figure S3.** Schematic of process for nano-in-nano integration guided by the high-precision placement control technique.
